# Supplementary material for: Paediatric Fabry disease: prognostic significance of ocular changes for disease severity
Source: Springer Nature journal article supplement (doi:10.1186/s12886-016-0374-2), 2016-11-16
Supplement: MOESM1 [file 11053726]

**Table S1.** List of ethics committees that approved the study

| <b>Ethics committee name</b>                                                                              | <b>Country</b> |
|-----------------------------------------------------------------------------------------------------------|----------------|
| Comisión Conjunta de Investigación en Salud – CCIS                                                        | Argentina      |
| Comité de Ética del Instituto Médico Platense – CEDIMP                                                    | Argentina      |
| Ethikkommission Der Medizinischen Universität Wien und des Allgemeinen Krankenhauses der Stadt Wien AKH   | Austria        |
| Royal Melbourne Hospital HREC                                                                             | Australia      |
| Commission d'Ethique Biomedicale Hospitalo – Facultair de l'UCL                                           | Belgium        |
| Commission d'Ethique C.H.U. Charleroi                                                                     | Belgium        |
| Universiteit Antwerpen Ethisch Comité                                                                     | Belgium        |
| Comissão Nacional de Ética em Pesquisa (CONEP)                                                            | Brazil         |
| Comitê de Ética em Pesquisa do Hospital de Clinicas de Porto Alegre                                       | Brazil         |
| Capital Health Research Ethics Board                                                                      | Canada         |
| Comité d'éthique de la recherche de l'Hôpital du Sacré-Coeur du Montréal                                  | Canada         |
| Comité d'éthique de la recherche en santé chez l'humain du Centre hospitalier universitaire de Sherbrooke | Canada         |
| Conjoint Health Research Ethics Board of the University of Calgary                                        | Canada         |
| Health Research Ethics Authority                                                                          | Canada         |
| Health Research Ethics Board of the University of Alberta                                                 | Canada         |
| Nova Scotia Health Authority Research Ethics Board                                                        | Canada         |
| SickKids Research Ethics Board                                                                            | Canada         |
| The University of British Columbia                                                                        | Canada         |
| University Health Network Research Ethics Board                                                           | Canada         |
| Vancouver Coastal Health Research Institute                                                               | Canada         |
| Eticka komise Vseobecne fakultni nemocnice v Praze                                                        | Czech Republic |
| Varsinais-Suomen Sairaanhoidopiiri Eettisen toimikunnan – Hospital District of South West Finland EC      | Finland        |
| Le Comité Consultatif sur le Traitement de l'information en matière de Recherche                          | France         |
| Ethikkommission an der Universitätsmedizin Greifswald                                                     | Germany        |
| Ethikkommission der Ärztekammer Westfalen-Lippe und der Medizinischen Fakultät der WWU Münster            | Germany        |
| Ethikkommission der Landesärztekammer Baden-Württemberg                                                   | Germany        |
| Ethikkommission der Landesärztekammer Rheinland-Pfalz                                                     | Germany        |
| Ethikkommission der Medizinischen Fakultät der Universität Würzburg                                       | Germany        |
| Ethikkommission der Medizinischen Fakultät der Universität zu Köln                                        | Germany        |
| Egeszsegügyi Tudományos Tanács Tudományos és Kutatásetikai Bizottság                                      | Hungary        |
| Shaare Zedek Medical Center Ethics Committee                                                              | Israel         |
| Comitato di Bioetica Fondazione I.R.C.C.S. Policlinico "San Matteo" di Pavia                              | Italy          |

|                                                                                                                       |                 |
|-----------------------------------------------------------------------------------------------------------------------|-----------------|
| Comitato Etico Area Monza Brianza                                                                                     | Italy           |
| Comitato Etico Azienda Ospedaliera "Pugliese-Ciaccio" di Catanzaro                                                    | Italy           |
| Comitato Etico Azienda Ospedaliero Universitaria, Policlinico "Paolo Giaccone" dell'Università degli Studi di Palermo | Italy           |
| Comitato Etico Aziende Sanitarie Umbria, Perugia                                                                      | Italy           |
| Comitato Etico Azienda Unità Sanitaria Locale di Viterbo                                                              | Italy           |
| Comitato Etico CE A.O. "Città della Salute e della Scienza" di Torino                                                 | Italy           |
| Comitato Etico della Provincia di Ferrara                                                                             | Italy           |
| Comitato Etico Locale Azienda Ospedaliero Universitaria Careggi, Firenze                                              | Italy           |
| Comitato Etico per la Ricerca Biomedica Università degli Studi "G. D'Annunzio" Azienda Sanitaria Locale – Chieti      | Italy           |
| Comitato Etico per le Attività Biomediche "Carlo Romano," Università degli Studi di Napoli "Federico II"              | Italy           |
| Comitato Etico Regionale delle Marche                                                                                 | Italy           |
| Comitato Etico Università Cattolica del Sacro Cuore Facoltà di Medicina e Chirurgia "Agostino Gemelli," Roma          | Italy           |
| Medisch Ethische Toetsingscommissie Universiteit van Amsterdam                                                        | The Netherlands |
| Comite de Etica Do Centro Hospitalar Do Alto Ave – EPE                                                                | Portugal        |
| Komisija Republike Slovenije Za Medicinsko Etiko                                                                      | Slovenia        |
| CEIC Hospital de Torrecárdenas (FIBAO)                                                                                | Spain           |
| CEIC Complejo Asistencial de Leon                                                                                     | Spain           |
| CEIC Complejo Hospitalario de Albacete                                                                                | Spain           |
| CEIC Consorcio Hospitalario Provincial de Castellón                                                                   | Spain           |
| CEIC de Andalucia (CCEIBA)                                                                                            | Spain           |
| CEIC de Aragon (CEICA)                                                                                                | Spain           |
| CEIC de Asturias                                                                                                      | Spain           |
| CEIC de Euskadi                                                                                                       | Spain           |
| CEIC de Galicia (CAEI)                                                                                                | Spain           |
| CEIC Fundació Sant Joan de Déu                                                                                        | Spain           |
| CEIC Hospital Clinic Barcelona                                                                                        | Spain           |
| CEIC Hospital Clínico Universitario de Valencia                                                                       | Spain           |
| CEIC Hospital de Donostia                                                                                             | Spain           |
| CEIC Hospital de Girona Dr. Josep Trueta                                                                              | Spain           |
| CEIC Hospital General de Elda                                                                                         | Spain           |
| CEIC Hospital General Universitario de Alicante                                                                       | Spain           |
| CEIC Hospital General Universitario de Elche                                                                          | Spain           |
| CEIC Hospital General Universitario de Guadalajara                                                                    | Spain           |
| CEIC Hospital Universitari Arnau de Vilanova                                                                          | Spain           |
| CEIC Hospital Universitari Vall d'Hebron                                                                              | Spain           |
| CEIC Hospital Universitario Dr. Peset                                                                                 | Spain           |
| CEIC Hospital Universitario Infanta Cristina                                                                          | Spain           |
| CEIC Hospital Universitari Germans Trias i Pujol                                                                      | Spain           |
| CEIC Hospital Universitario y Politecnico la Fe                                                                       | Spain           |
| CEIC Islas Baleares (CEIC-IB)                                                                                         | Spain           |
| CEIC La Paz University Hospital                                                                                       | Spain           |

|                                                                          |                |
|--------------------------------------------------------------------------|----------------|
| CEIC ASTURIAS                                                            | Spain          |
| Fundació Puigvert                                                        | Spain          |
| Institut d'Investigació Biomèdica de Bellvitge (IDIBELL)                 | Spain          |
| Goteborgs Universitet Medicinska Fakultetens<br>Forskningsetik Kommitte  | Sweden         |
| Commission Cantonale (VD) d'éthique de la recherche sur<br>l'être humain | Switzerland    |
| Kantonale Ethikkommission Zürich                                         | Switzerland    |
| Institutional Review Board of National Cheng Kung<br>University Hospital | Taiwan         |
| Institutional Review Board of Taichung Veterans General<br>Hospital      | Taiwan         |
| Institutional Review Board of Taipei Veterans General<br>Hospital        | Taiwan         |
| Institutional Review Board of the Veterans General Hospital<br>Kaohsiung | Taiwan         |
| Cambridgeshire 2 Research Ethics Committee                               | United Kingdom |
| Baylor Research Institute                                                | United States  |
