# Supplementary material for: Paediatric Fabry disease: prognostic significance of ocular changes for disease severity
Source: Springer Nature journal article supplement (doi:10.1186/s12886-016-0374-2), 2016-11-16

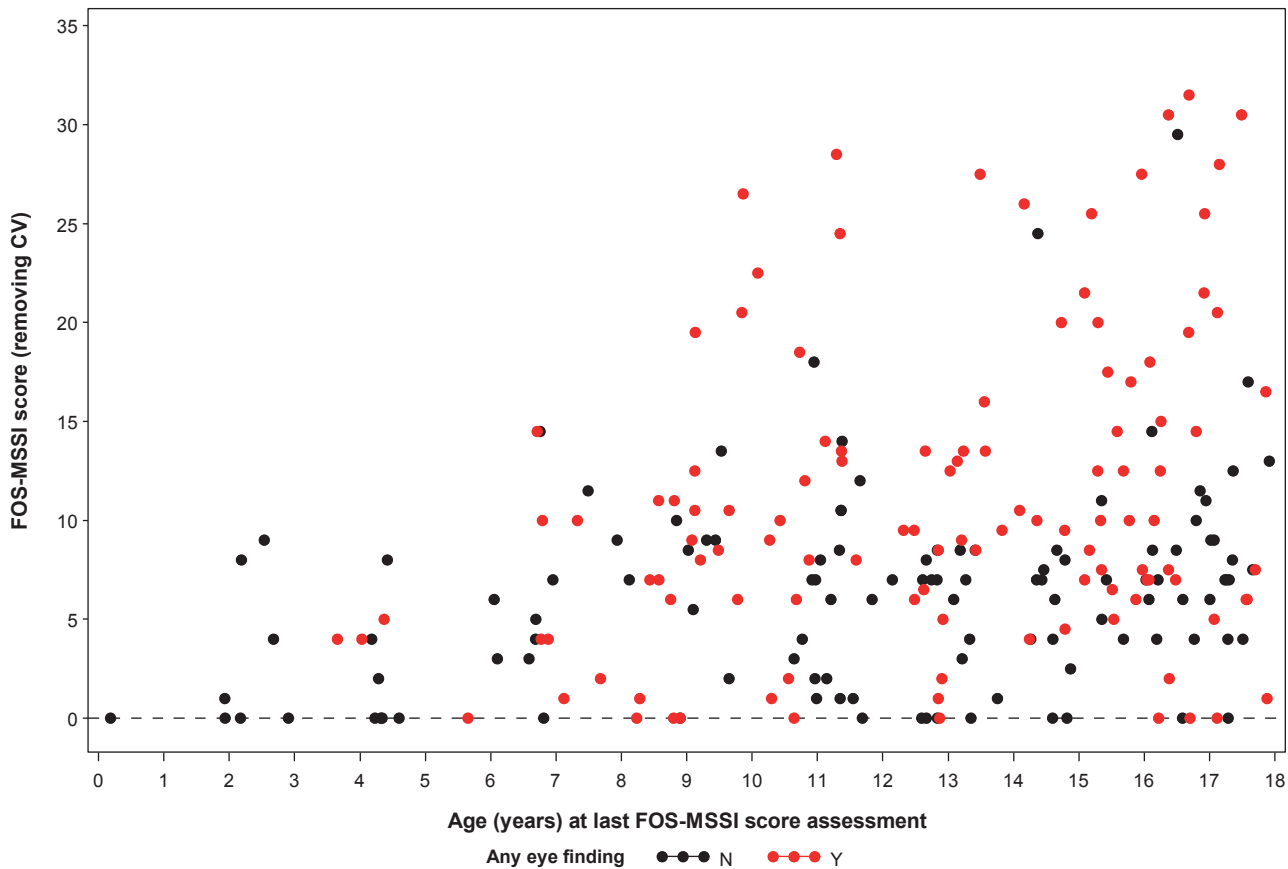

Supplement: MOESM2 [file 11053726]
